# Supplementary material
Source: Springer Nature journal article supplement (https://www.springermedizin.de/resource/supplementary/12875_2012_876_MOESM2_ESM.pdf/9435720)
Supplement: MOESM2 [file 9435720]

PERSONS  $\geq$  65 YEARS  
*FRAILITY 10.4%*

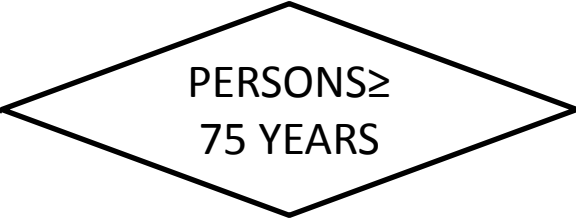

NO (48.5%)  
*FRAILITY 1.4%*

YES (51.5%)  
*FRAILITY 19%*

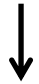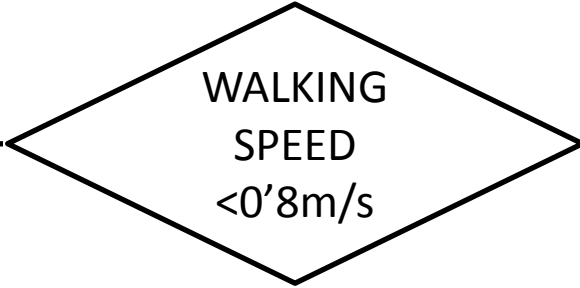

NO (21.4%)  
*FRAILITY 0.3%*

YES (30.1%)  
*FRAILITY 32.1%*

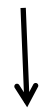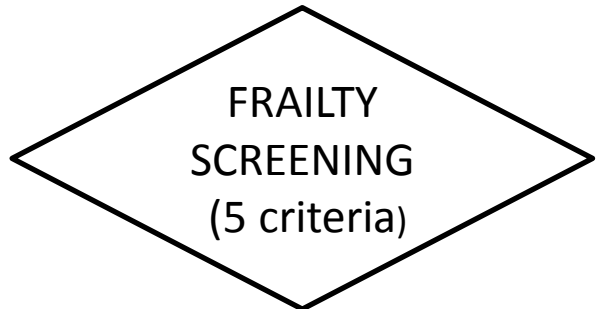

(\*) The proportions of population and frailty are calculated using the study results and weighted data by age and sex for the reference population
